# Supplementary material for: Highly selective and sensitive colorimetric chemosensors for Hg2+ based on novel diaminomaleonitrile derivatives
Source: Royal Society of Chemistry journal article supplement (doi:10.1039/c5ra21474b), 2016-01-01
Supplement: c5ra21474b1.pdf [file c5ra21474b1.pdf]

# Highly selective and sensitive colorimetric chemosensors for $\text{Hg}^{2+}$ based on novel diaminomaleonitrile derivatives

Yanping Huo <sup>a, b,\*</sup>, Songying Wang <sup>a</sup>, Tianhua Lu <sup>a</sup>, Chengqiang Pan <sup>a</sup>,  
Yujing Lu <sup>a</sup>, Xianghua Yang <sup>a</sup>, Dongping Hu <sup>a</sup>, Sheng Hu <sup>a</sup>

<sup>a</sup> School of Chemical Engineering and Light Industry, Guangdong University of Technology,  
Guangzhou 510006, China

<sup>b</sup>Key laboratory of Organofluorine Chemistry, Shanghai Institute of Organic Chemistry, Chinese  
Academy of Sciences, Shanghai 200032, China

\*E-mail: yphuo@gdut.edu.cn(Y.-P. Huo);

## Contents:

|                                                                                               |    |
|-----------------------------------------------------------------------------------------------|----|
| 1. The spectra of characteristic results.....                                                 | 2  |
| 1.1. $^1\text{H}$ -NMR $^{19}\text{F}$ -NMR and $^{13}\text{C}$ -NMR.....                     | 2  |
| 1.2. Mass spectra .....                                                                       | 7  |
| 2. UV-vis response to various metal ions in ethanol/ $\text{H}_2\text{O}$ .....               | 8  |
| 2.1. Competitive experiment with $\text{Hg}^{2+}$ ion responses to various metal ions.....    | 10 |
| 2.2. Titration curve to $\text{Hg}^{2+}$ .....                                                | 12 |
| 2.3. Job's plot in ethanol/ $\text{H}_2\text{O}$ (v/v = 4:1, 20mm Hepes buffer, pH=7.0) ..... | 14 |
| 2.4. The stable range of pH values. ....                                                      | 16 |
| 2.5. Cell imaging.....                                                                        | 17 |

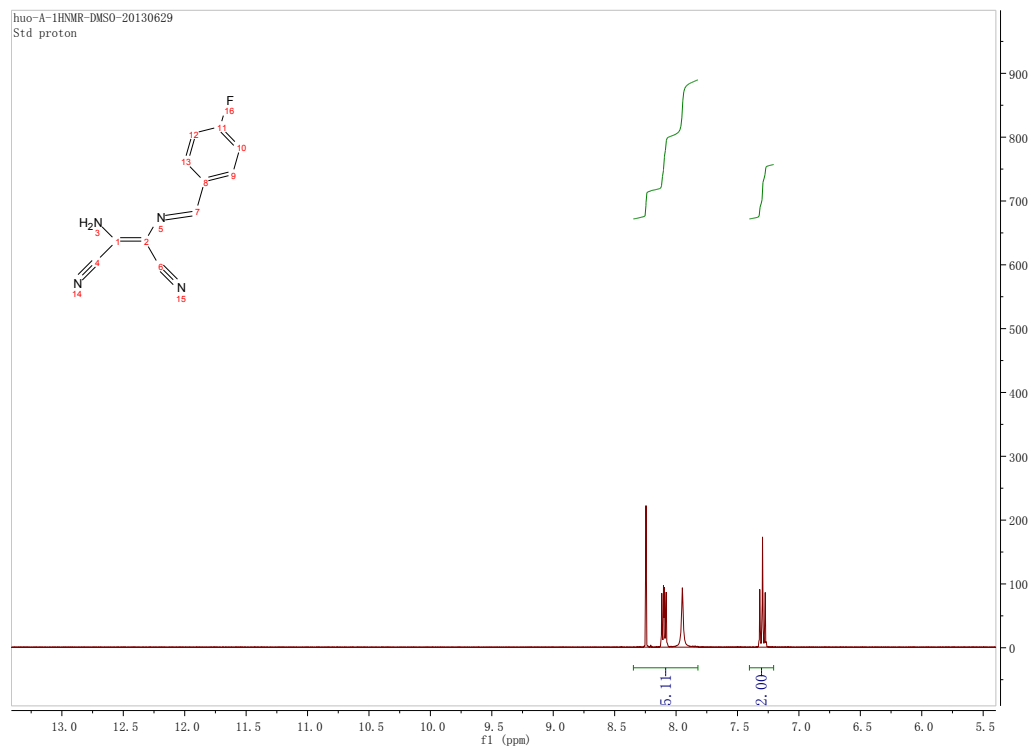

Figure S1.  $^1\text{H}$  NMR of A1

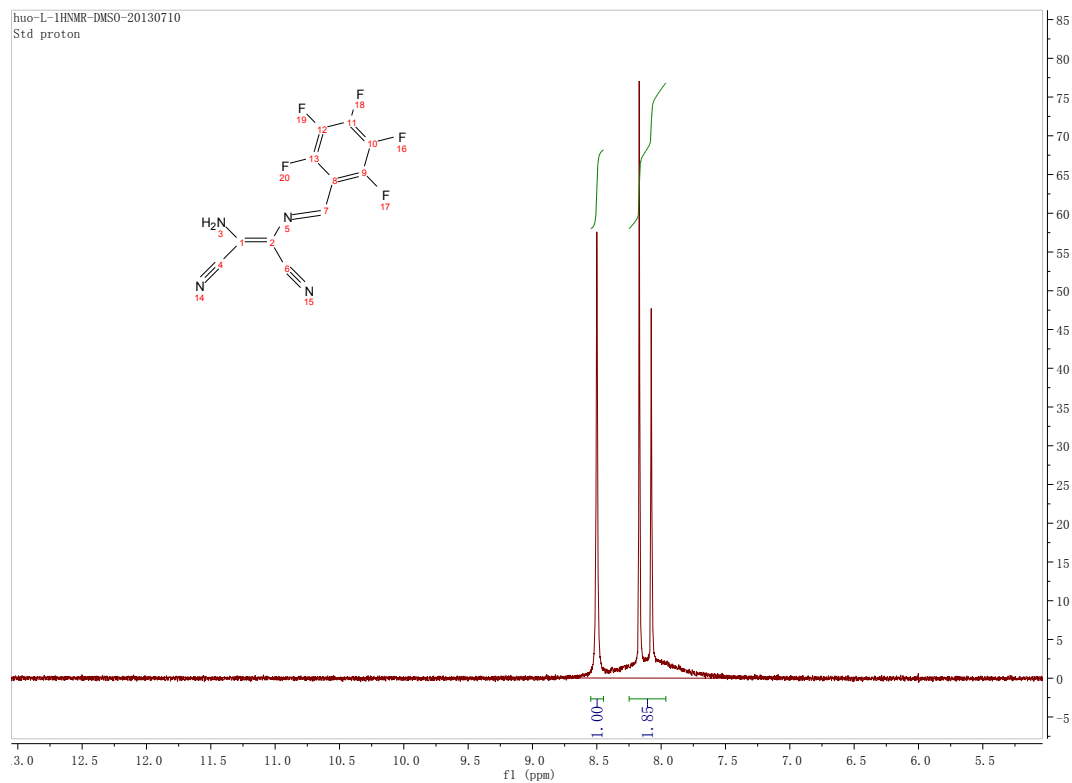

Figure S2.  $^1\text{H}$  NMR of A2

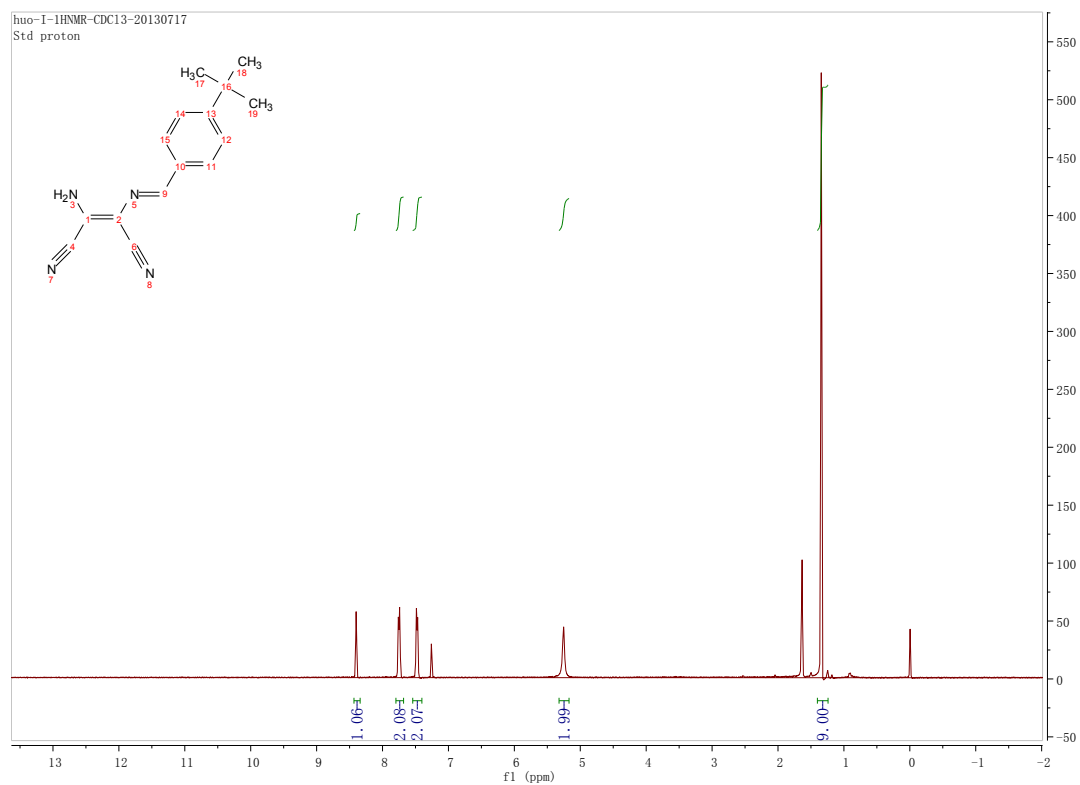

Figure S3.  $^1\text{H}$  NMR of A3

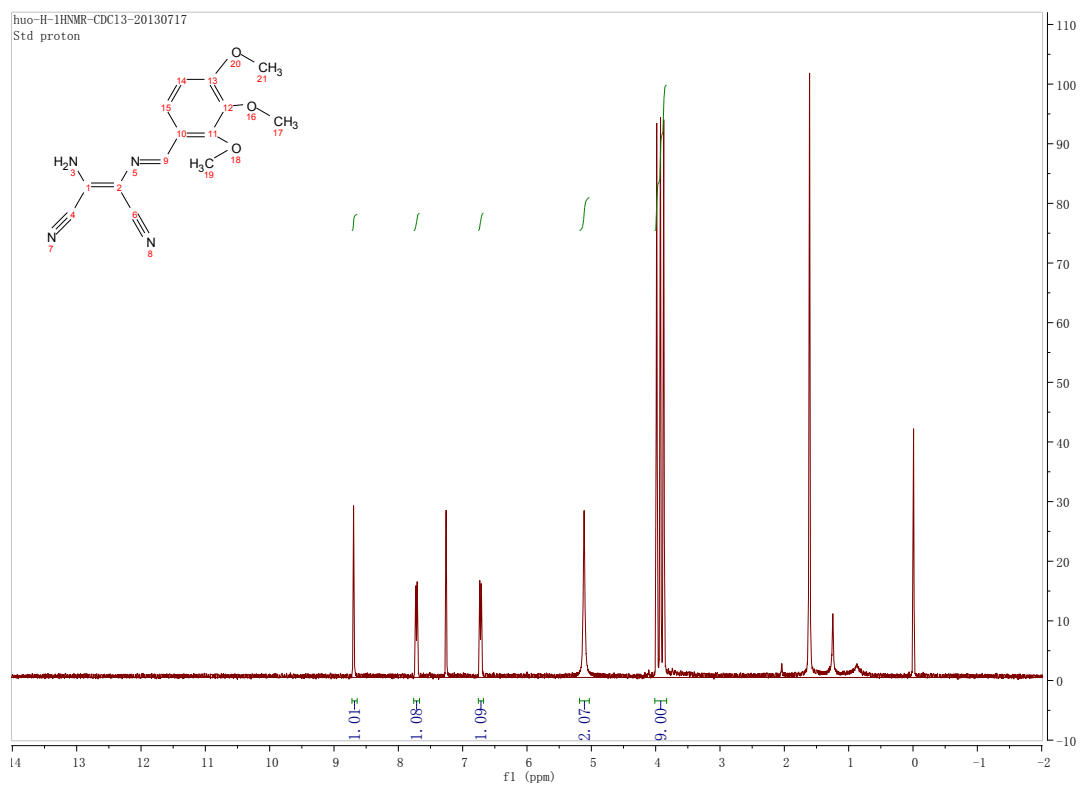

Figure S4.  $^1\text{H}$  NMR of A4

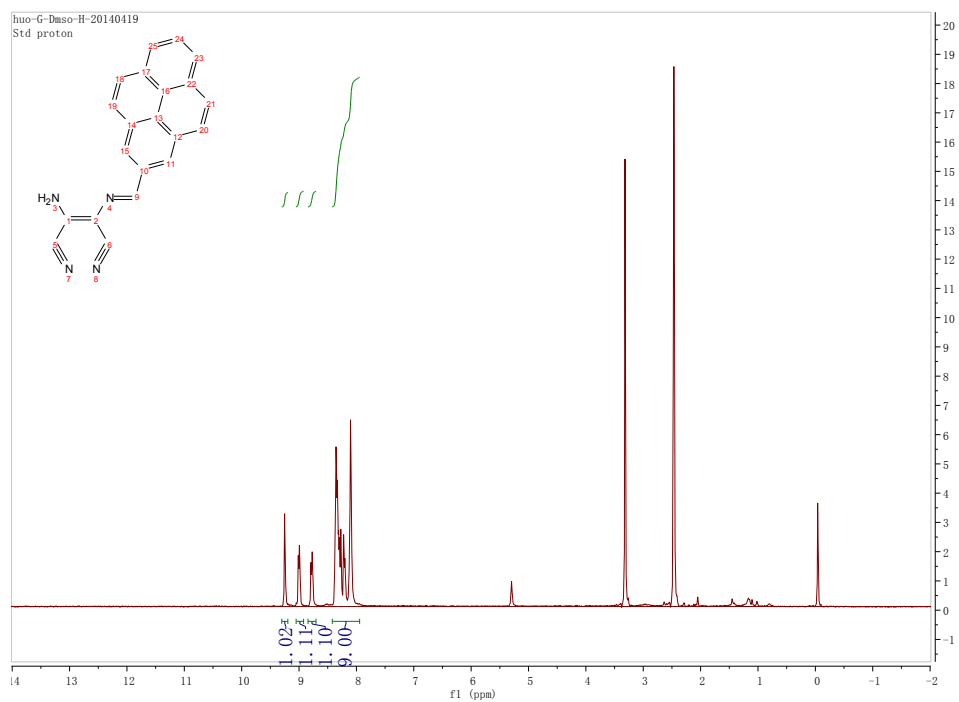

Figure S5.  $^1\text{H}$  NMR of A5

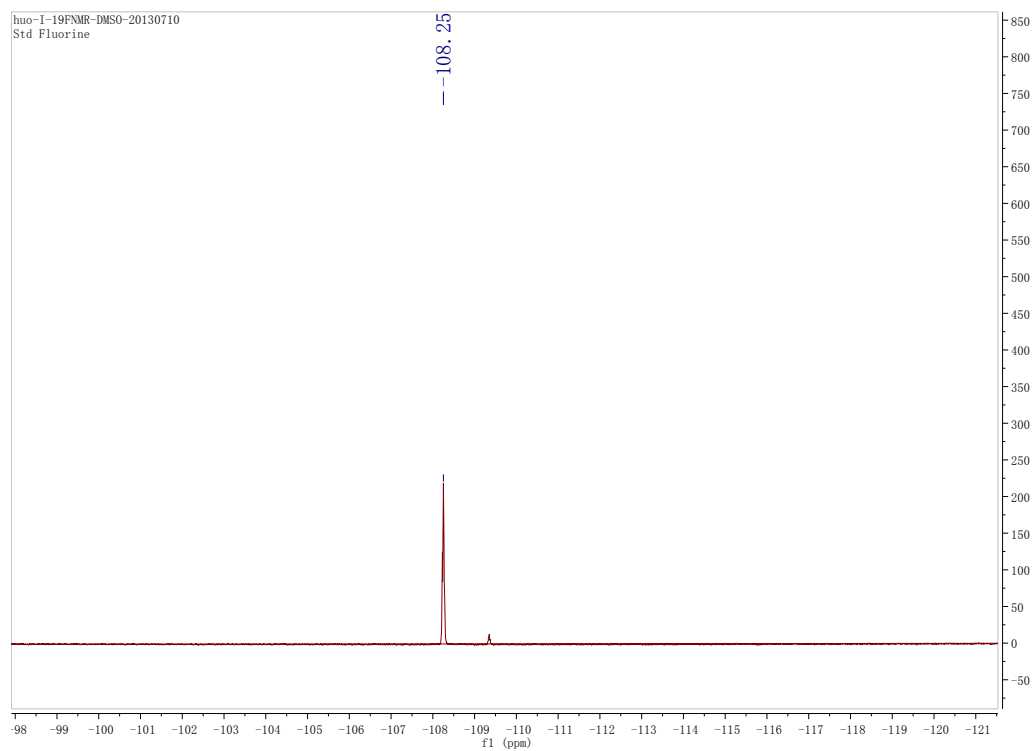

Figure S6.  $^{19}\text{F}$  NMR of A1

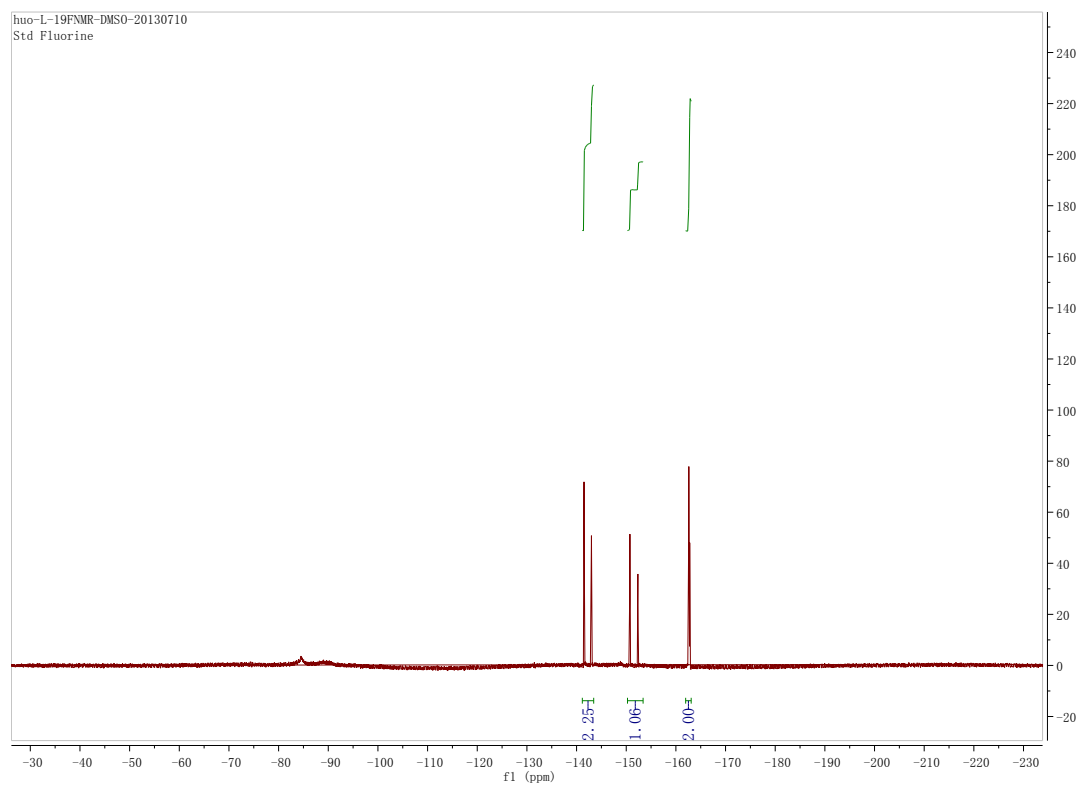

Figure S7.  $^{19}\text{F}$  NMR of A2

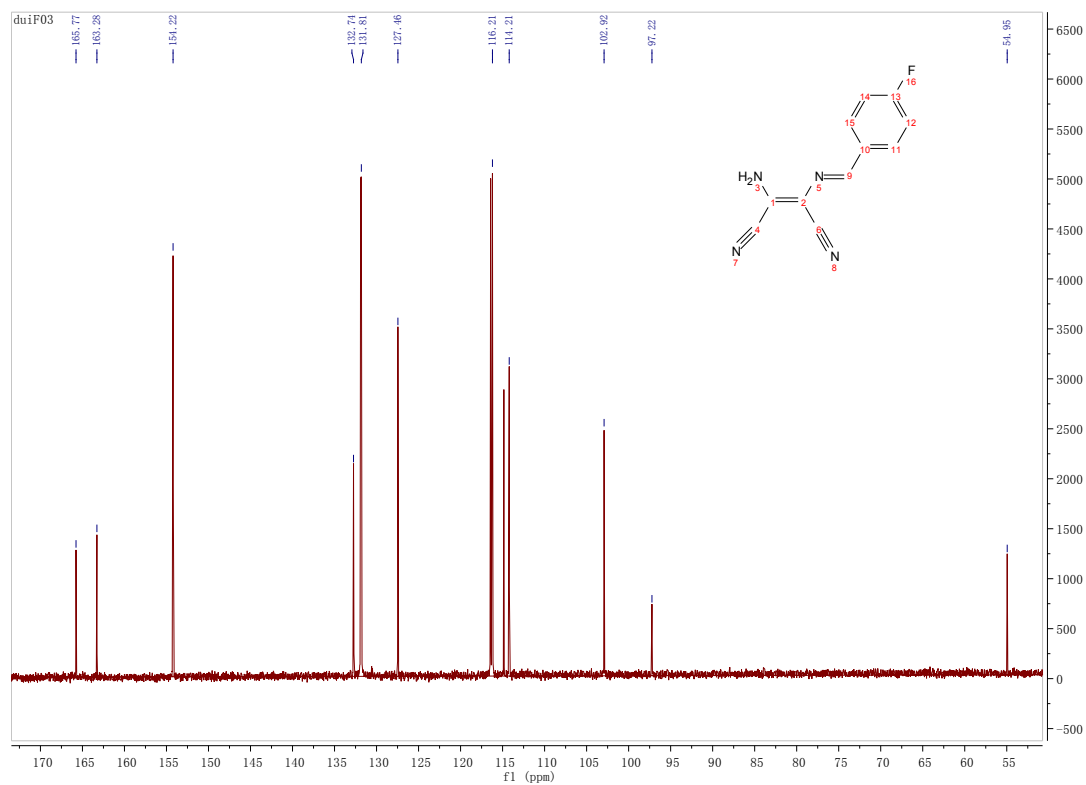

Figure S8.  $^{13}\text{C}$  NMR of A1

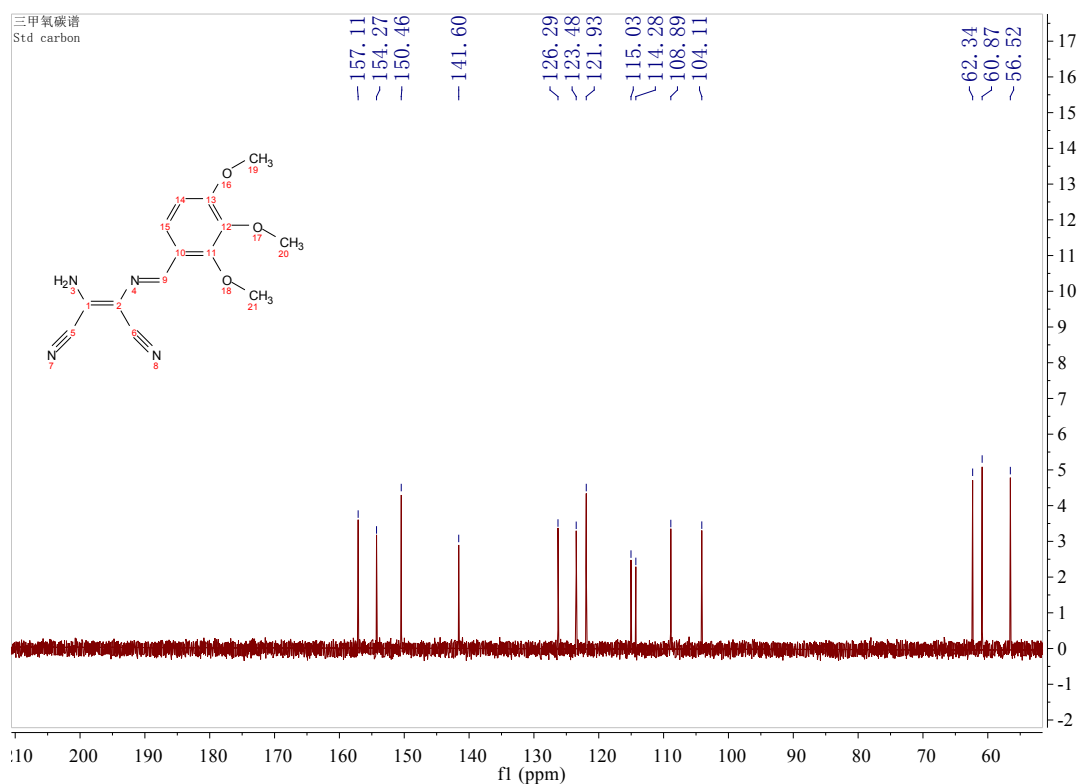

Figure S9. <sup>13</sup>C NMR of A4

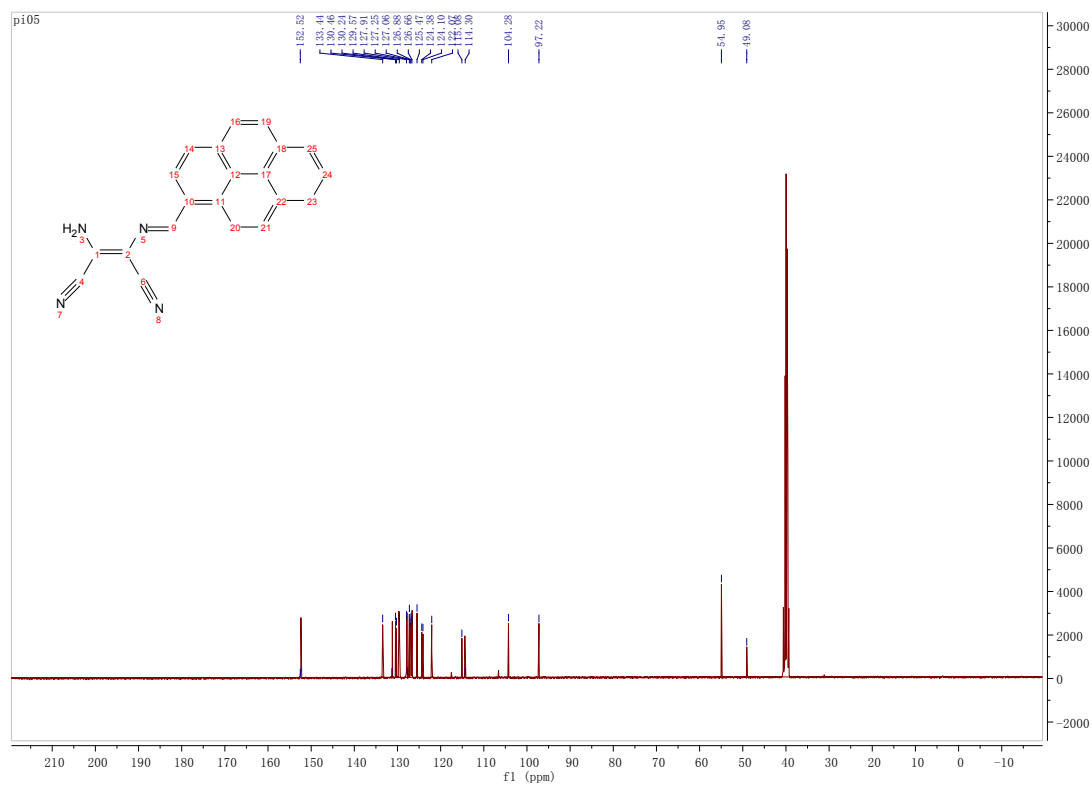

Figure S10. <sup>13</sup>C NMR of A5

112204 #43 RT: 1.12 AV: 1 NL: 3.41E6  
T: +c Full ms [45.00-800.00]

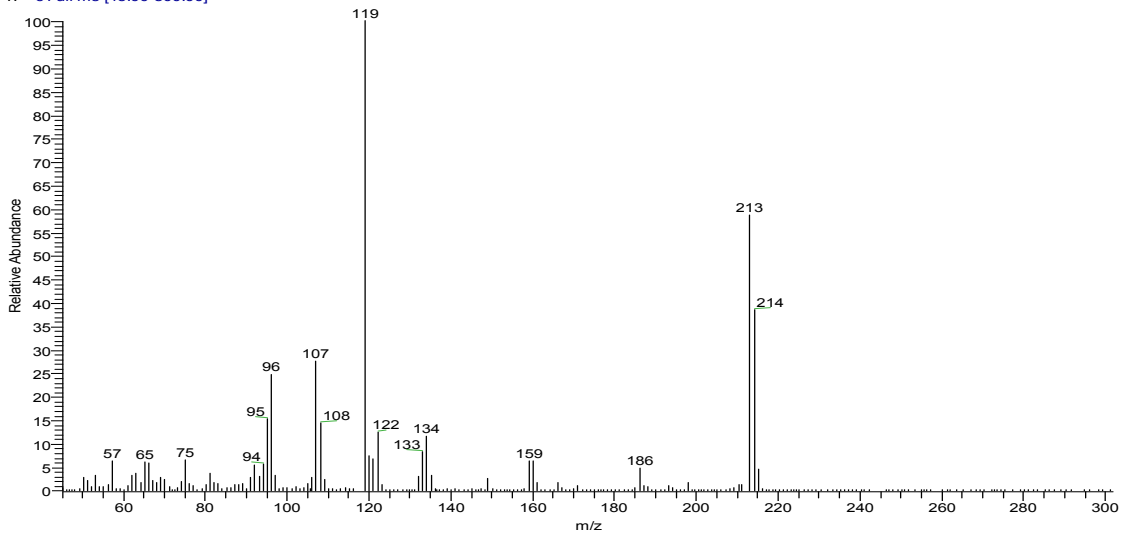

Figure S11. EI mass spectrum of A1

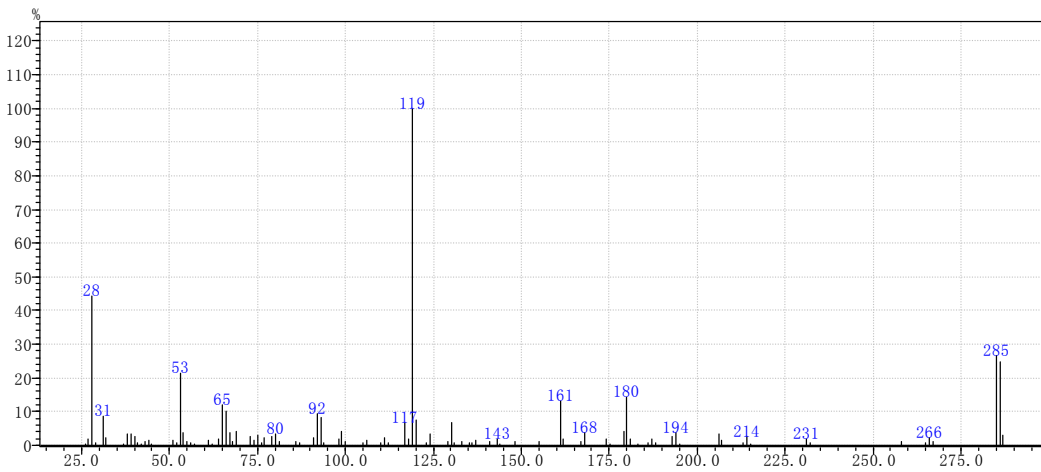

Figure S12. EI mass spectrum of A2

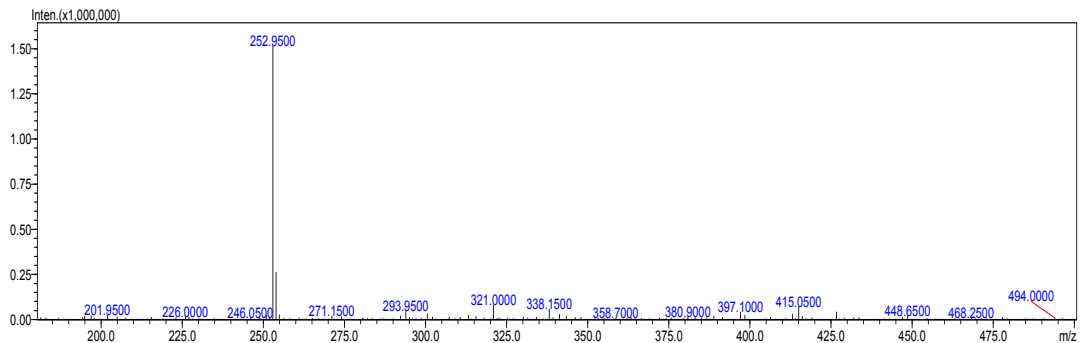

Figure S13. ESI mass spectrum of A3

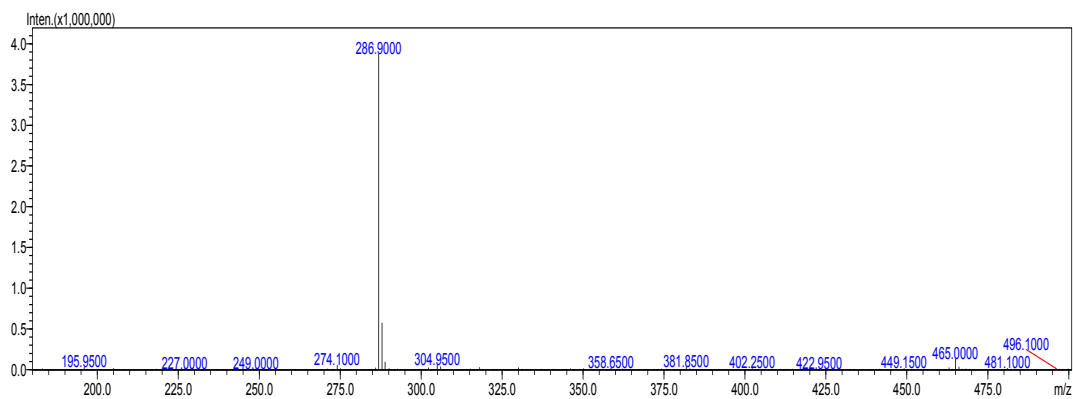

Figure S14. ESI mass spectrum of **A4**

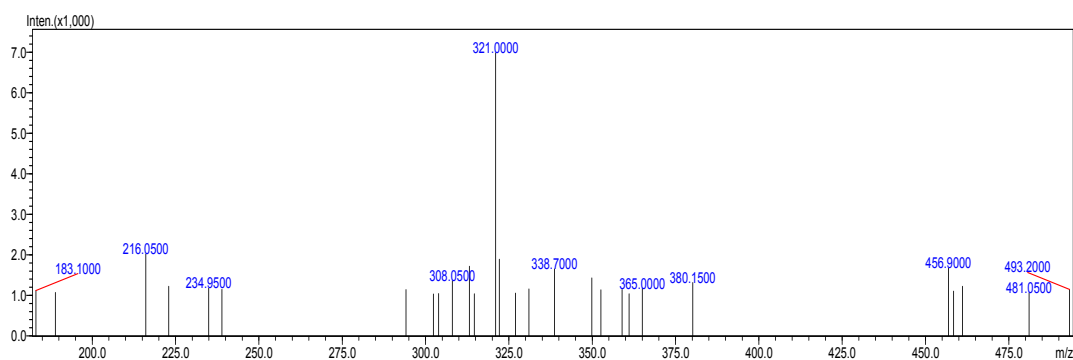

Figure S15. ESI mass spectrum of **A5**

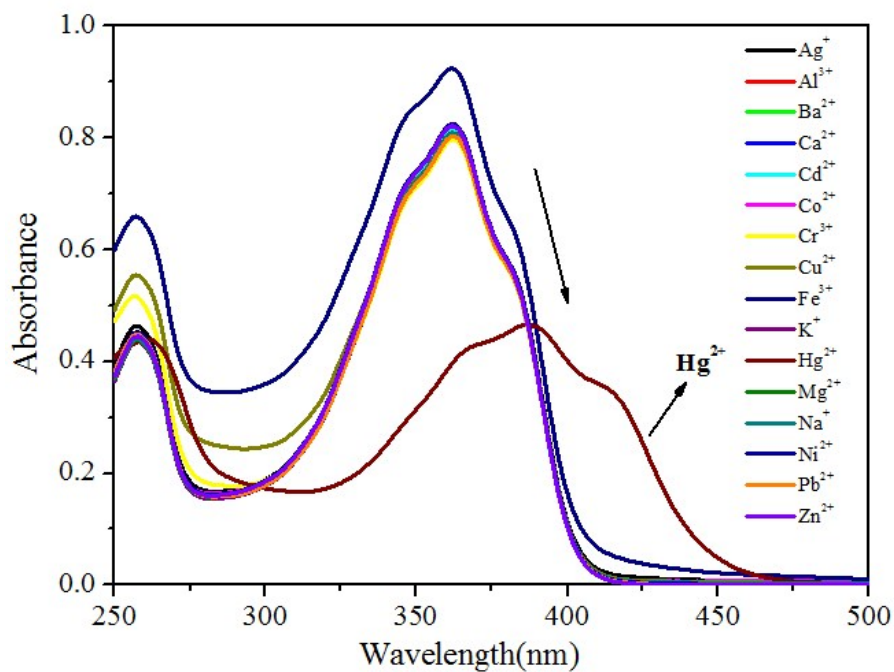

Figure S16. Absorption changes of **A1** in EtOH/H<sub>2</sub>O (v/v = 4:1,  $1.0 \times 10^{-5}$  M) upon addition of 1 equiv of different nitrate salts ( $1.0 \times 10^{-5}$  M).



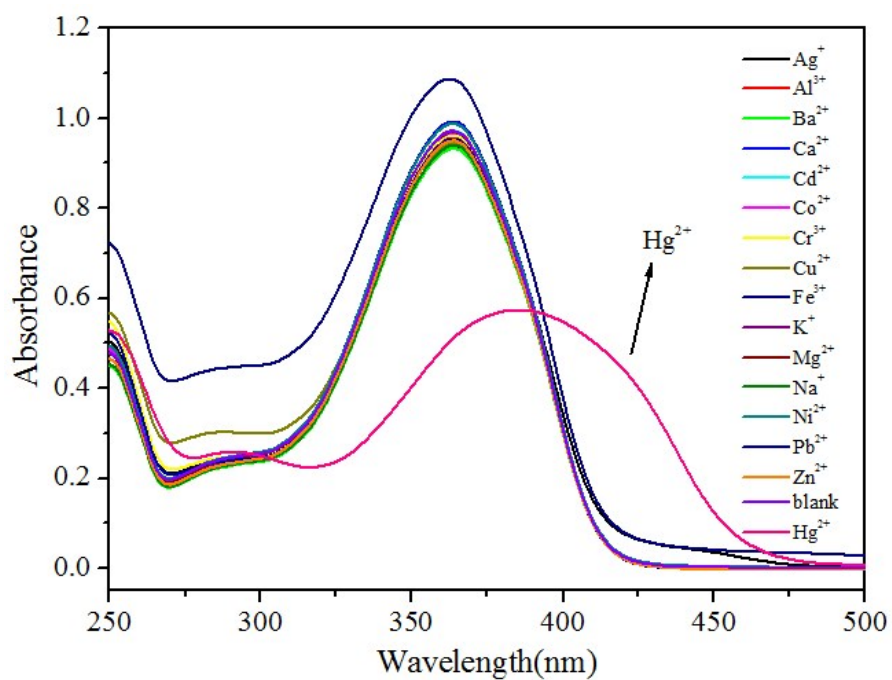

Figure S17. UV-vis responses of **A2** to various metal ions in EtOH/H<sub>2</sub>O (v/v = 4:1).

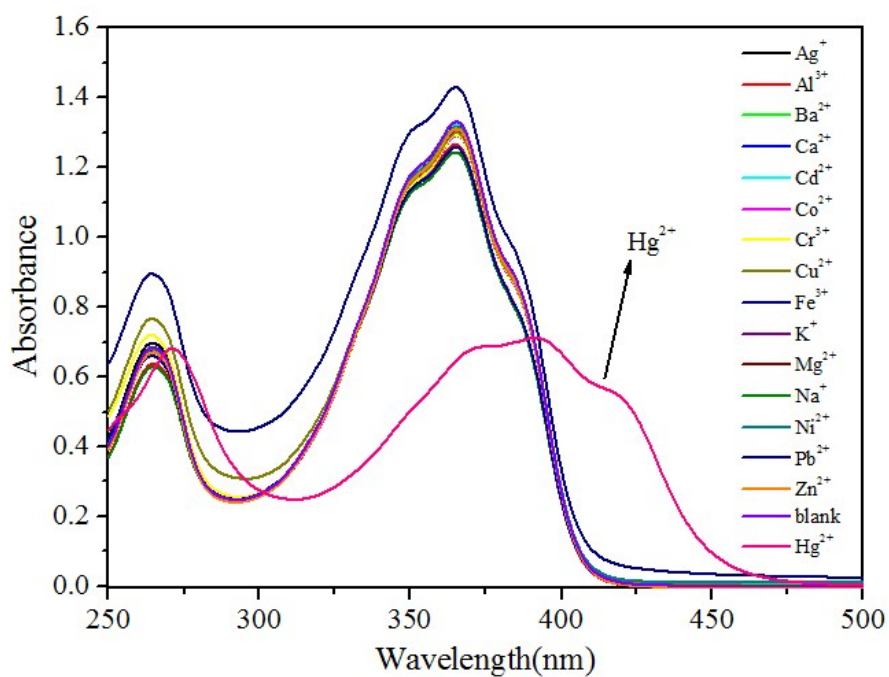

Figure S18. UV-vis responses of **A3** to various metal ions in EtOH/H<sub>2</sub>O (v/v = 4:1).

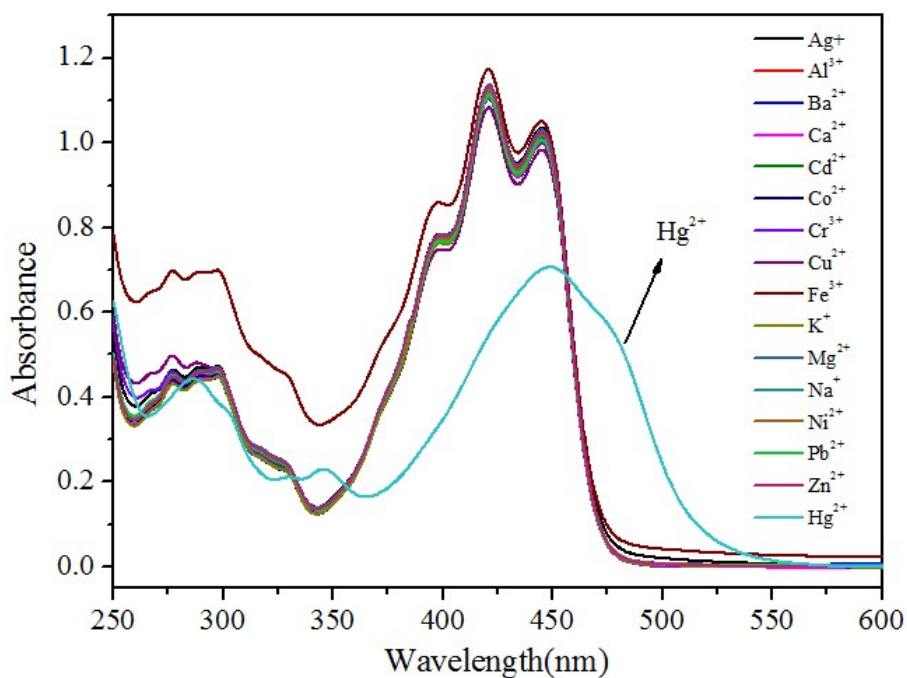

Figure S19. UV-vis responses of **A5** to various metal ions in EtOH/H<sub>2</sub>O(v/v = 4:1).

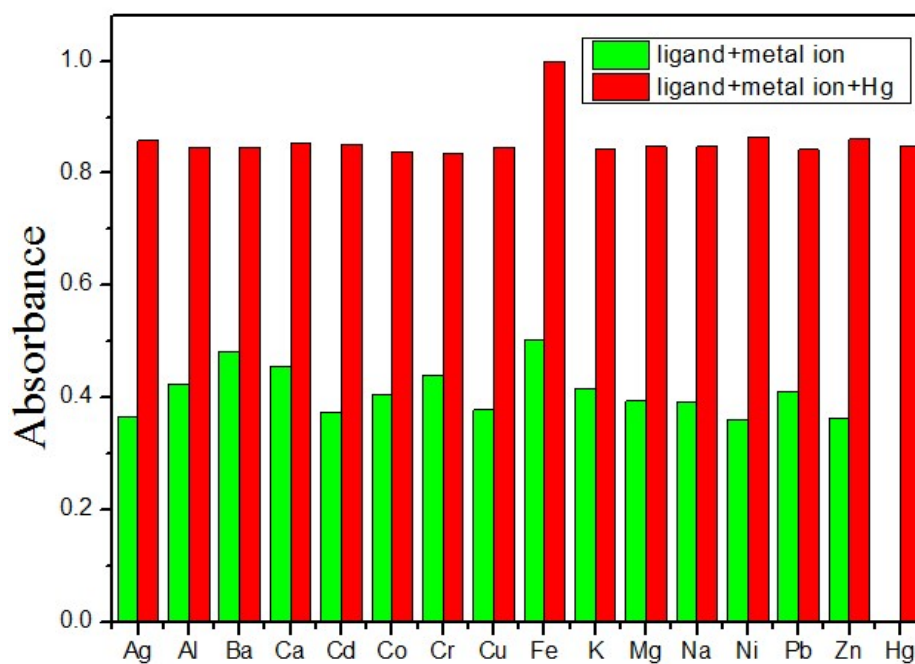

Figure S20. Absorbance of **A1**-Hg<sup>2+</sup> at the new band upon addition of various cations. The low bars represent **A1** ( $1.0 \times 10^{-5}$  M) with cations ( $5.0 \times 10^{-5}$  M) without Hg<sup>2+</sup>; the high bars represent **A1** ( $1.0 \times 10^{-5}$  M) with cations ( $5.0 \times 10^{-5}$  M) upon the subsequent addition of Hg<sup>2+</sup> ( $1.0 \times 10^{-5}$  M) in EtOH/H<sub>2</sub>O(v/v = 4:1).

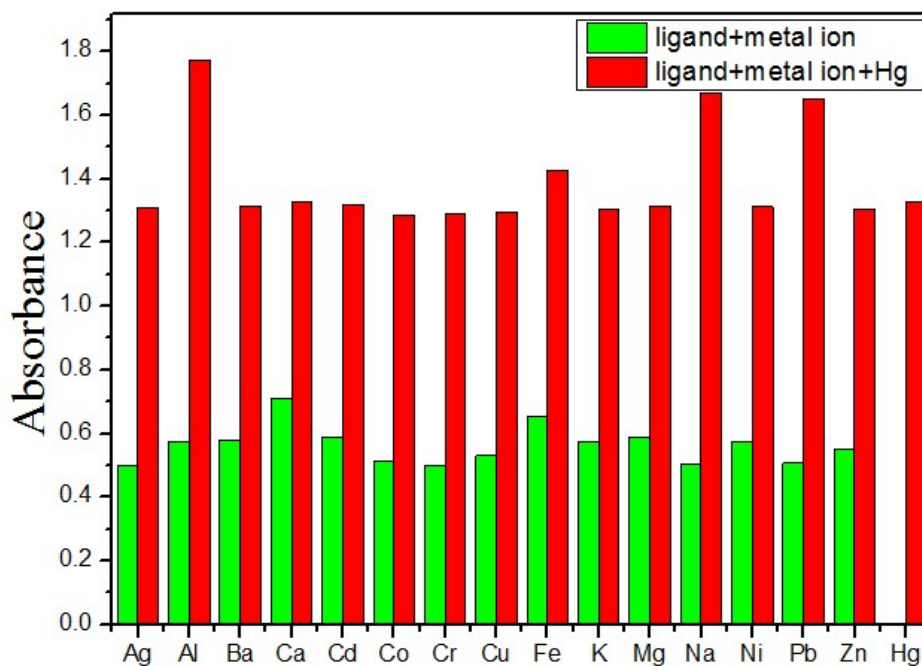

Figure S21. Absorbance of **A3**-Hg<sup>2+</sup> at the new band upon addition of various cations. The low bars represent **A3** ( $1.0 \times 10^{-5}$  M) with cations ( $5.0 \times 10^{-5}$  M) without Hg<sup>2+</sup>; the high bars represent **A3** ( $1.0 \times 10^{-5}$  M) with cations ( $5.0 \times 10^{-5}$  M) upon the subsequent addition of Hg<sup>2+</sup> ( $1.0 \times 10^{-5}$  M) in EtOH/H<sub>2</sub>O(v/v = 4:1).

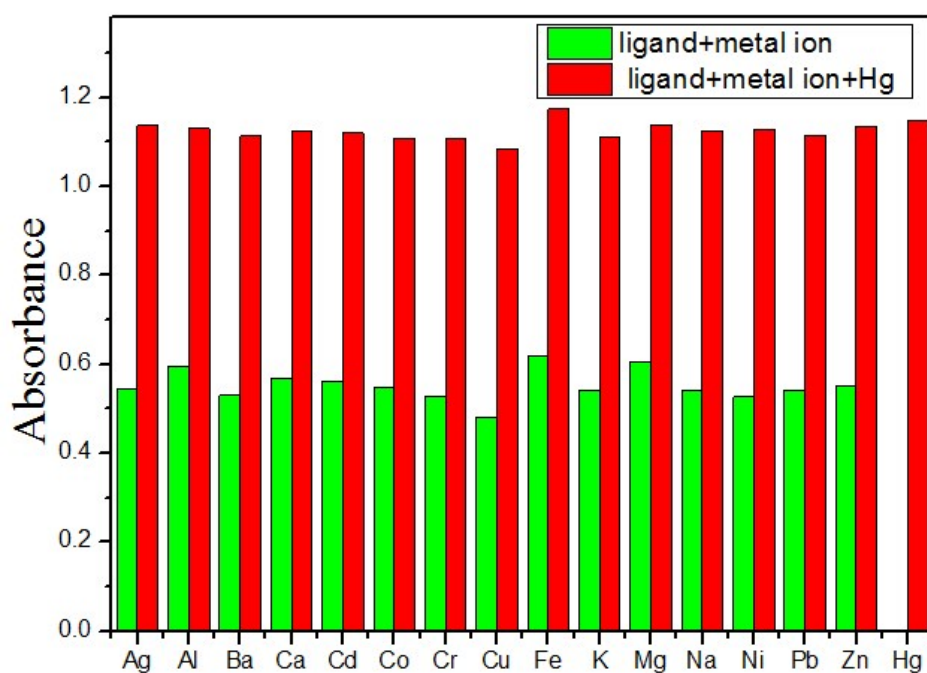

Figure S22. Absorbance of **A5**-Hg<sup>2+</sup> at the new band upon addition of various cations. The low bars represent **A5** ( $1.0 \times 10^{-5}$  M) with cations ( $5.0 \times 10^{-5}$  M) without Hg<sup>2+</sup>; the high bars represent **A5** ( $1.0 \times 10^{-5}$  M) with cations ( $5.0 \times 10^{-5}$  M) upon the subsequent addition of Hg<sup>2+</sup> ( $1.0 \times 10^{-5}$  M) in EtOH/H<sub>2</sub>O(v/v = 4:1).

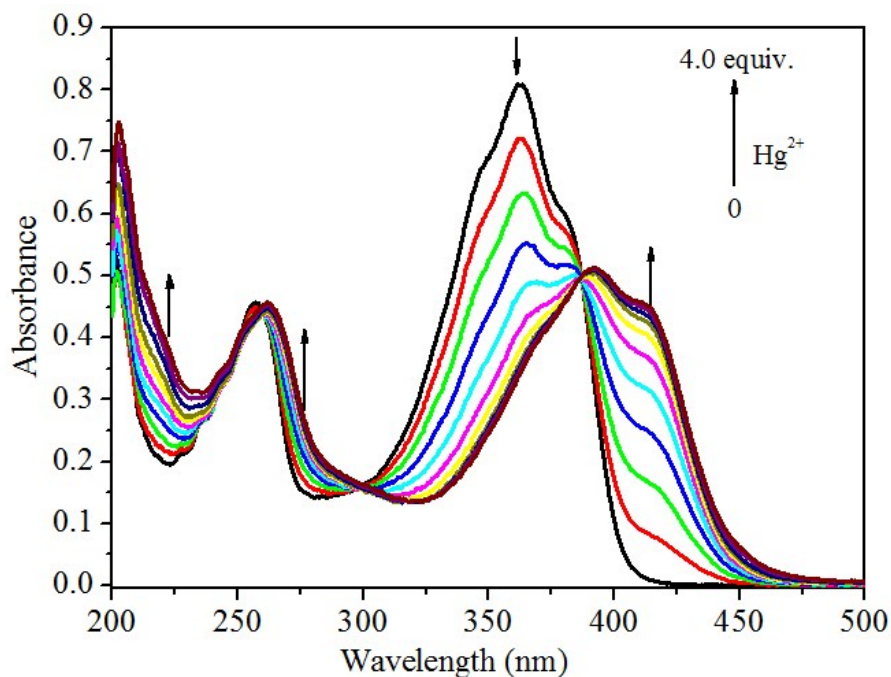

Fig. S23. Titration curves of **A1** in EtOH/H<sub>2</sub>O(v/v = 4:1) in the presence of different amounts of Hg<sup>2+</sup>.

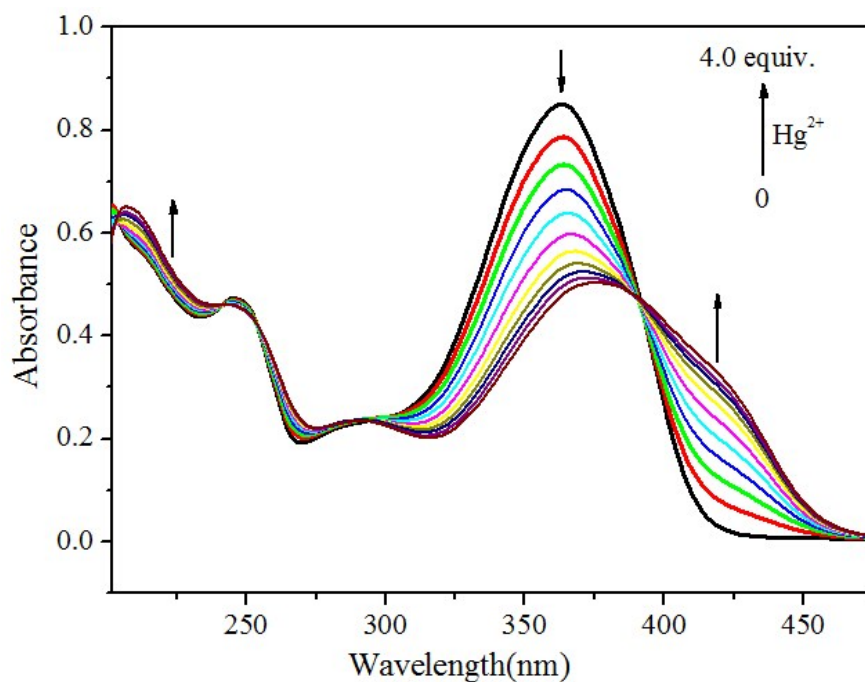

Figure S24. Titration curves of **A2** ( $1.0 \times 10^{-5}$  M) in EtOH/H<sub>2</sub>O (v/v = 4:1, 20mM HEPES buffer, pH=7.0) in the addition of 0.5 equiv. per drop.

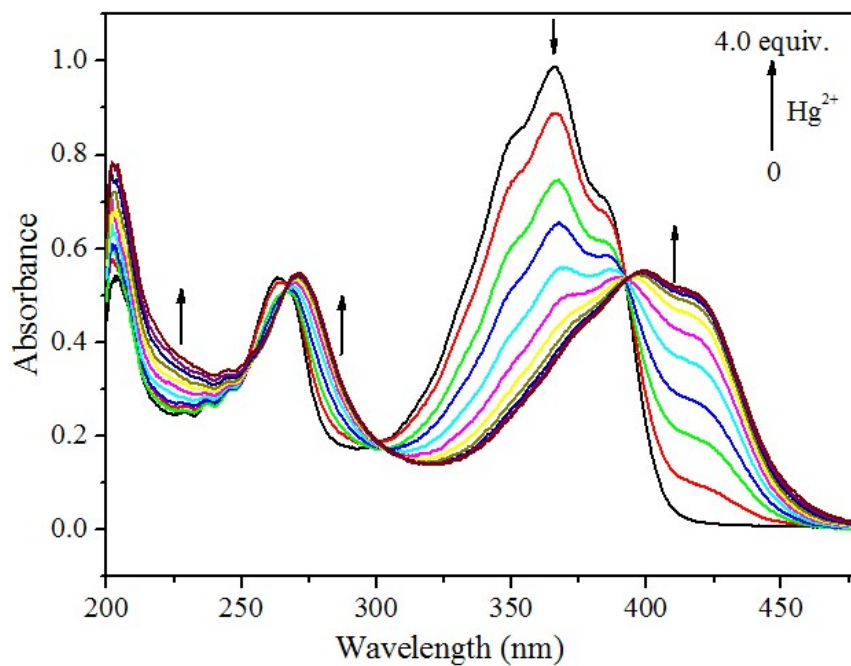

Figure S25. Titration curves of **A3** ( $1.0 \times 10^{-5}$  M) in EtOH/H<sub>2</sub>O (v/v = 4:1, 20 mM HEPES buffer, pH=7.0) in the addition of 0.5 equivolar per drop.

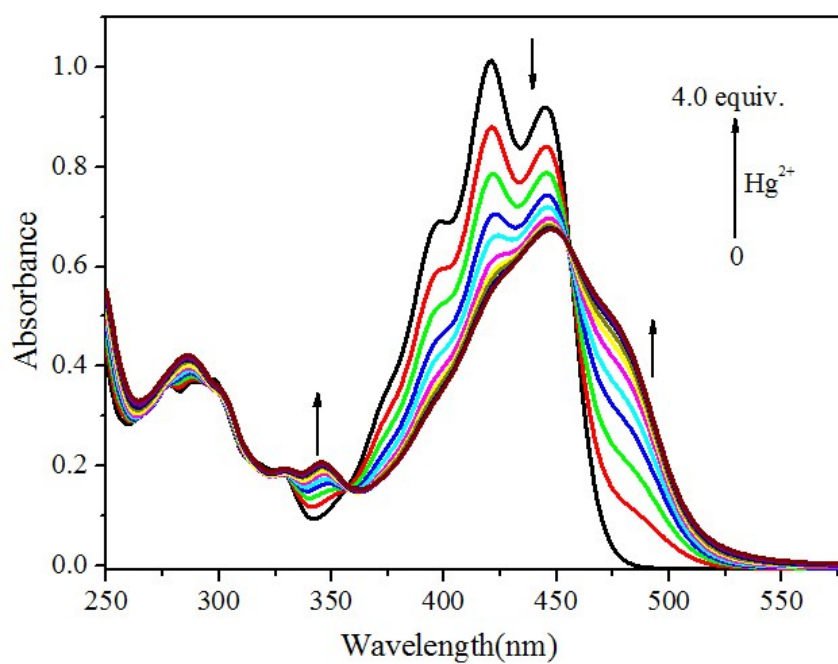

Figure S26. Titration curves of **A5** ( $1.0 \times 10^{-5}$  M) in EtOH/H<sub>2</sub>O (v/v = 4:1, 20 mM HEPES buffer, pH=7.0) in the addition of 0.5 equivolar per drop.

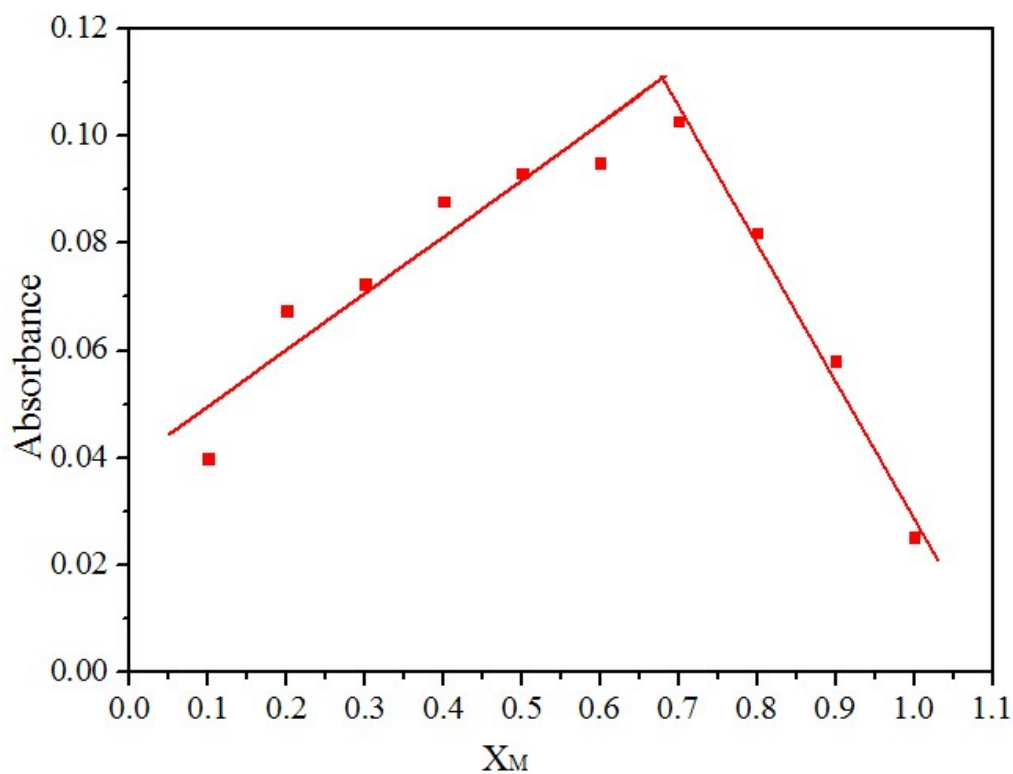

Figure S27. Absorbance spectral changes of stoichiometry calculations based on absorbance changes at 380 nm;  $X_M = [Hg^{2+}]/([Hg^{2+}]+[A1])$ ; where  $X_M$  = mole fraction,  $[Hg^{2+}]$  and  $[A1]$  are concentrations of  $Hg^{2+}$  and A1;  $A1+Hg^{2+} = 2:1$  stoichiometry (ca. 0.66).

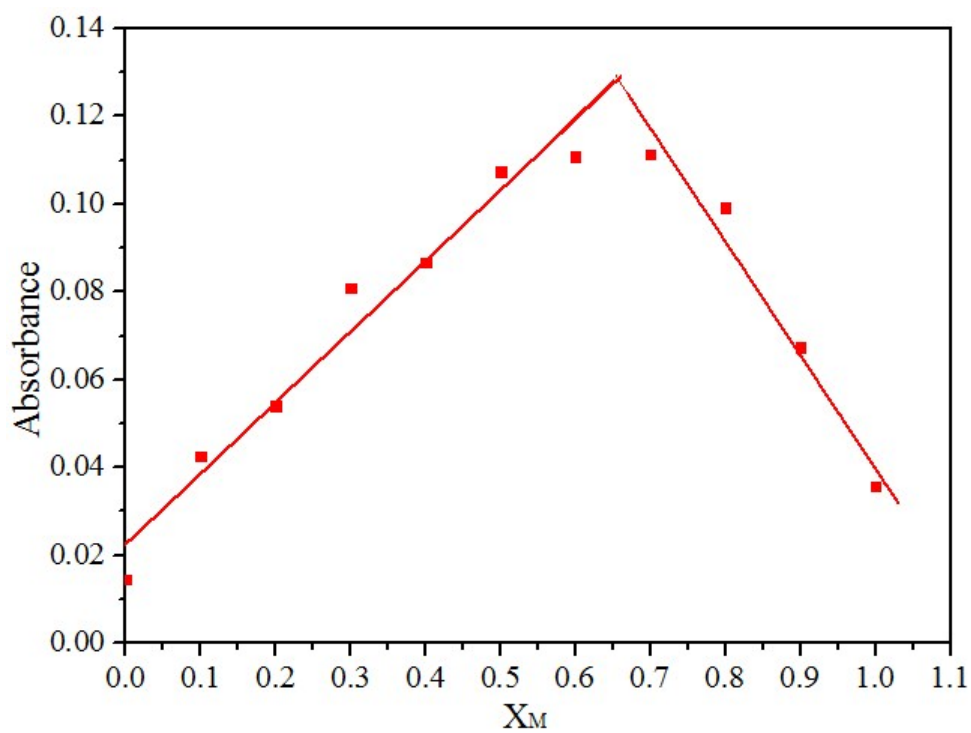

Figure S28. Absorbance spectral changes of stoichiometry calculations based on absorbance changes at 430 nm;  $X_M = [Hg^{2+}]/([Hg^{2+}] + [A2])$ ; where  $X_M$  = mole fraction,  $[Hg^{2+}]$  and  $[A2]$  are concentrations of  $Hg^{2+}$  and A2;  $A2+Hg^{2+} = 2:1$  stoichiometry (ca. 0.66).

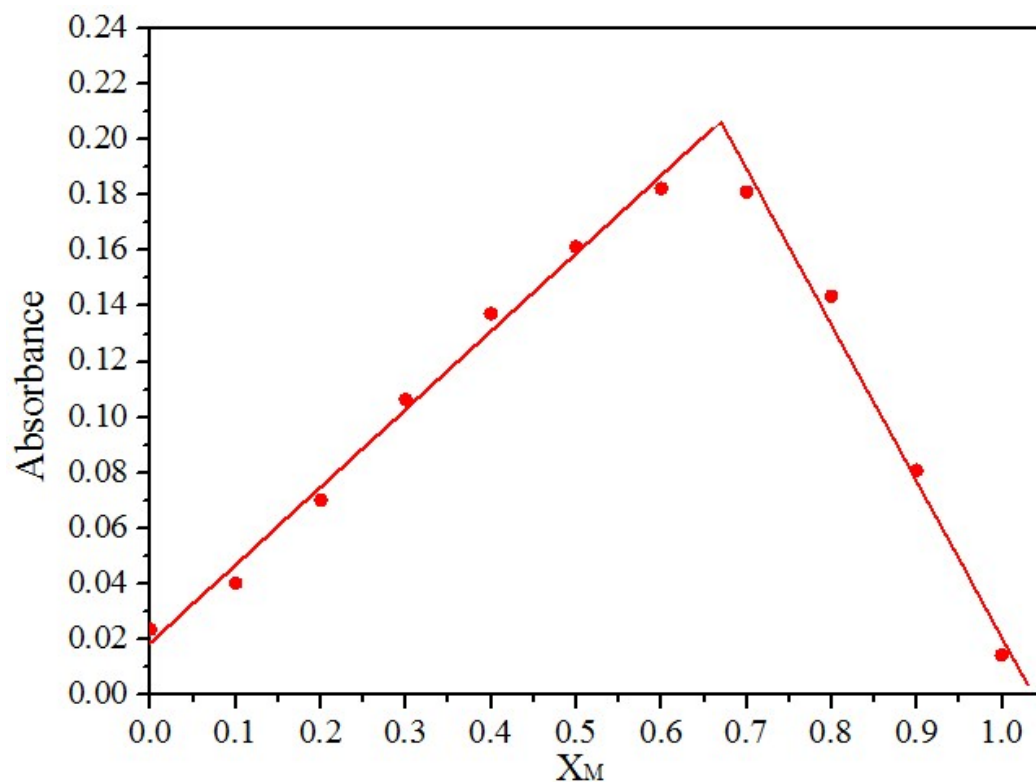

Figure S29. Absorbance spectral changes of stoichiometry calculations based on absorbance changes at 405 nm;  $X_M = [Hg^{2+}]/([Hg^{2+}] + [A3])$ ; where  $X_M$  = mole fraction,  $[Hg^{2+}]$  and  $[A3]$  are concentrations of  $Hg^{2+}$  and A3;  $A3+Hg^{2+} = 2:1$  stoichiometry (ca. 0.66).



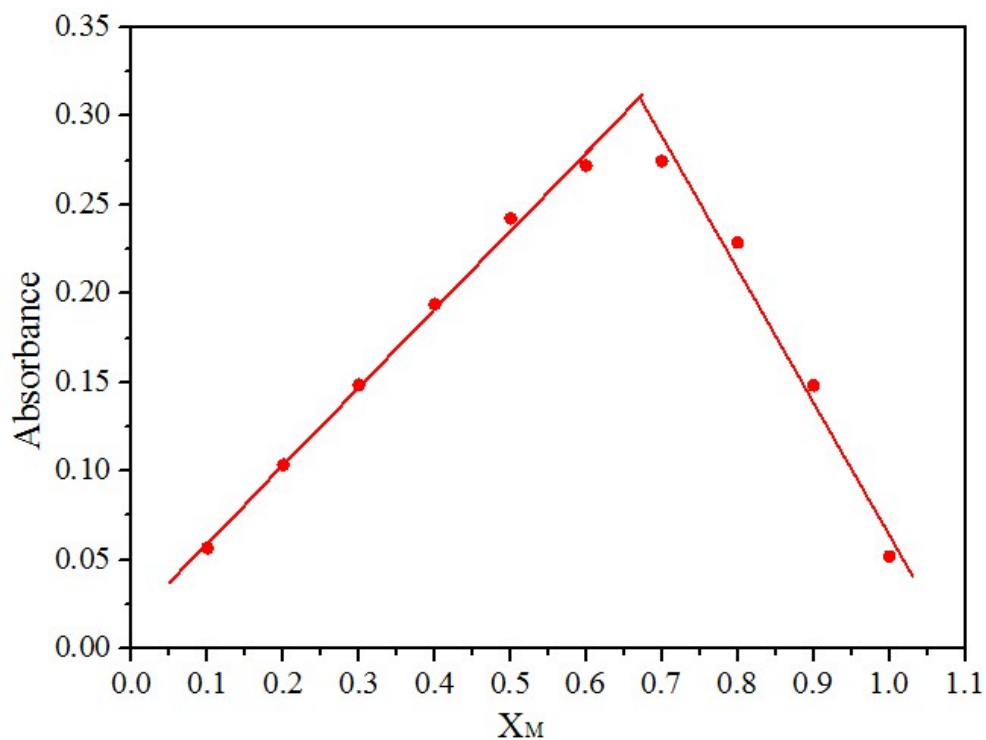

Figure S30. Absorbance spectral changes of stoichiometry calculations based on absorbance changes at 450 nm;  $X_M = [Hg^{2+}]/([Hg^{2+}]+[A5])$ ; where  $X_M$  = mole fraction,  $[Hg^{2+}]$  and  $[A5]$  are concentrations of  $Hg^{2+}$  and A5;  $A5+Hg^{2+} = 2:1$  stoichiometry (ca. 0.66).

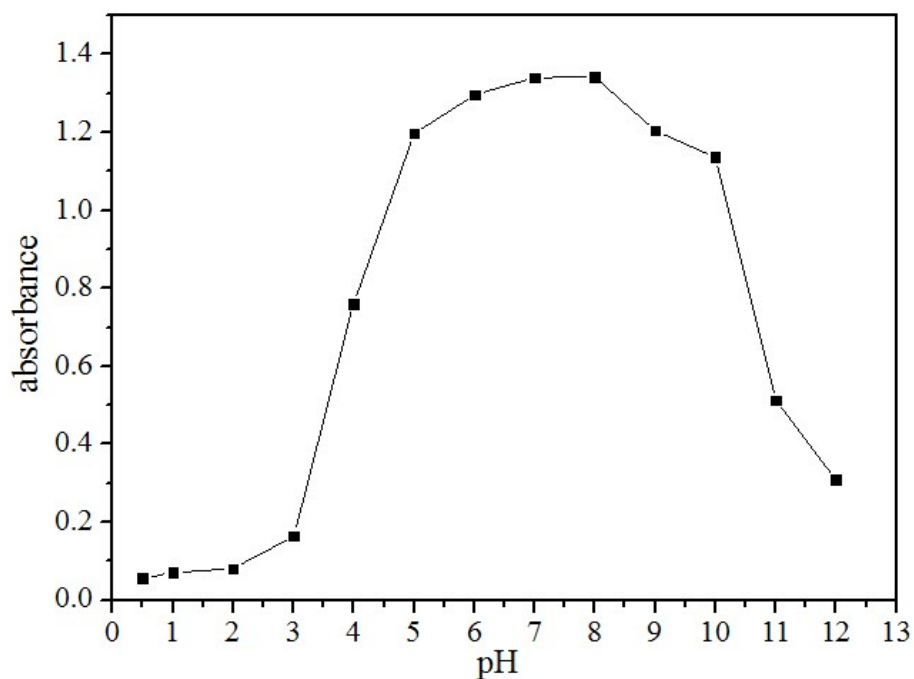

Figure S31. Shows that **A1** is stable within a wide pH range of 5.0–10.0, and the following tests are in the range of pH.



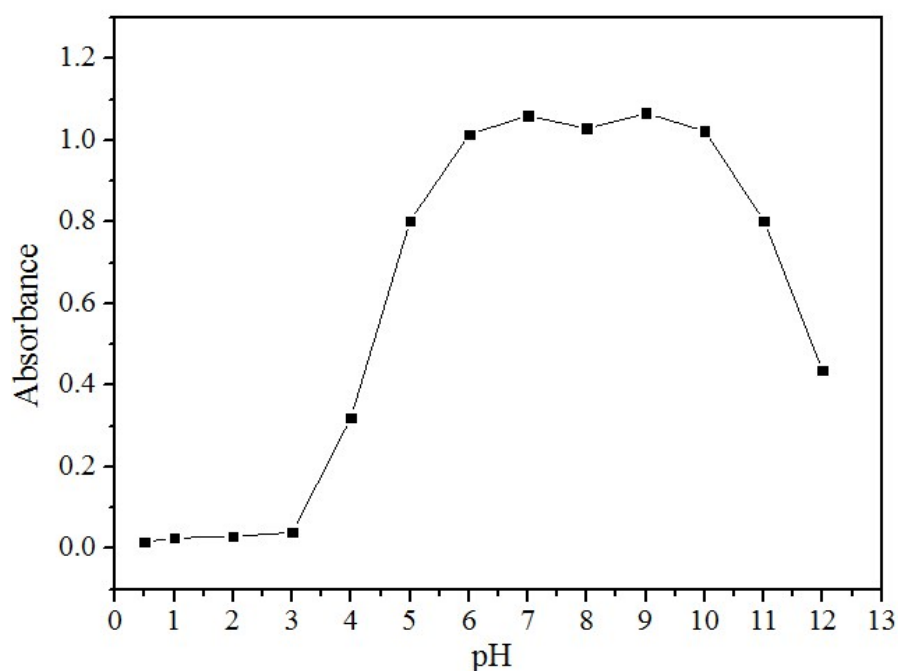

Figure S32. The stable range of pH values on **A3**, chemosensor **A3** ( $1.0 \times 10^{-5}$  M) was added in 1.0 mL EtOH/H<sub>2</sub>O solution (v/v = 4:1, 20 mM buffer). The buffers were: pH 1.0–2.0, HCl; pH 2.5–4.0, KHP/HCl; pH 4.5–6.0, KHP/NaOH; pH 6.5–10.0 HEPES/NaOH, pH 11.0–12.0 NaOH.

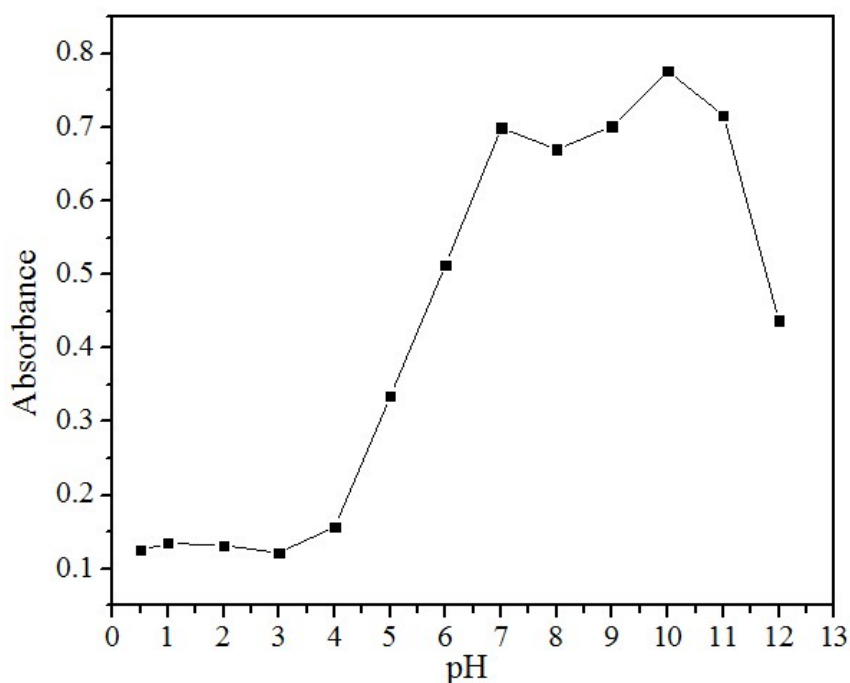

Figure S33. The stable range of pH values on **A5**, chemosensor **A5** ( $1.0 \times 10^{-5}$  M) was added in 1.0 mL EtOH/H<sub>2</sub>O solution (v/v = 2 : 1, 20 mM buffer). The buffers were: pH 1.0–2.0, HCl; pH 2.5–4.0, KHP/HCl; pH 4.5–6.0, KHP/NaOH; pH 6.5–10.0 HEPES/NaOH, pH 11.0–12.0 NaOH.

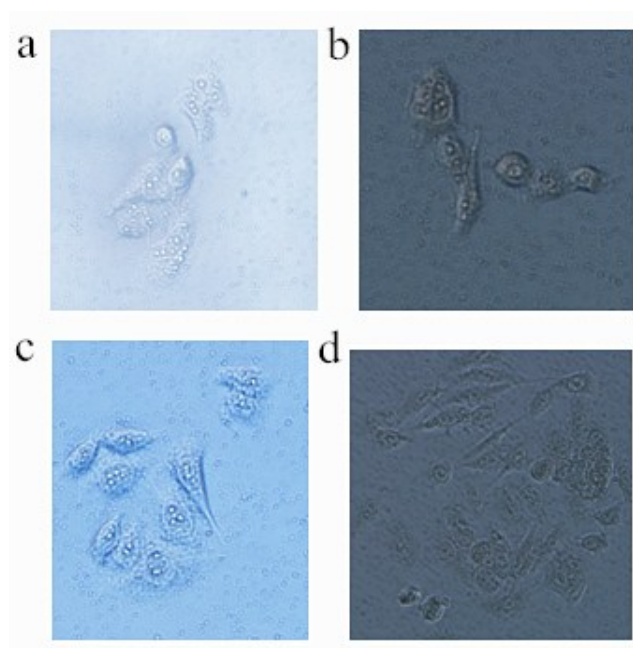

**Figure S34.** (a) Light micrograph of PC3 cellular treated with **A1**. (b) Light micrograph of PC3 cellular treated with **A1** and  $\text{Hg}^{2+}$ . (c) Light micrograph of PC3 cellular treated with **A2**. (d) Light micrograph of PC3 cellular treated with **A2** and  $\text{Hg}^{2+}$ .

**Table S1**

The UV–vis absorption data of ligands **A1–A5** and complexes **B1–B5**.

| Ligands   | $\lambda_1$ | $\lambda_2$ | Complexes | $\lambda_1$ | $\lambda_2$ |
|-----------|-------------|-------------|-----------|-------------|-------------|
| <b>A1</b> | 257         | 362         | <b>B1</b> | 262         | 392         |
| <b>A2</b> | 245         | 364         | <b>B2</b> | 245         | 375         |
| <b>A3</b> | 263         | 365         | <b>B3</b> | 272         | 399         |
| <b>A4</b> | 279         | 377         | <b>B4</b> | 288         | 382         |
| <b>A5</b> | 287         | 343         | <b>B5</b> | 295         | 449         |
